# Supplementary material for: Fatigue Evaluation through Machine Learning and a Global Fatigue Descriptor
Source: Hindawi journal article supplement (doi:10.1155/2020/6484129), 2020-01-07
Supplement: f1 [file 6484129.f1.pdf]

## A. Supplementary Material | Algorithm for Identification of IFD

### Study Conditions

$EMG_{param}$  = [EMG parameters of Table 1]  
 $HRV_{param}$  = [HRV parameters of Table 1]  
 $W_{SEMG}$  = [5, 10, 15, 20, 25] muscular activation periods  
 $W_{SHRV}$  = [30, 40, 50, 60, 70, 80, 90, 100, 110, 120] s  
 $\#Participants_{EMG}$  = 14  
 $\#Participants_{HRV}$  = 11

### Study Conditions Applied to the Algorithm

$\{signal\}$  = *EMG* or *HRV*

### Generic Algorithm

```

foreach  $P_k$  in  $\{signal\}_{param}$  do
   $WS_{best} = None$ 
   $TS_{best} = None$ 
   $CV_{best} = \infty$ 
  foreach  $WS_z$  in  $WS_{\{signal\}}$  do
     $TS = [0, 10, 25, 50, 75, 90]\%$  of  $WS_z$ 
    foreach  $TS_y$  in  $TS$  do
       $m_{array} = []$ 
       $\sigma^2_{array} = []$ 
      for  $n = 1$  to  $\#Participants_{\{signal\}}$  do
        if  $CV[WS_z; TS_y] < CV_{best}$  then
          1) Generation of the evolution time series of  $P_k$  for a sliding
              window configuration of window size  $WS_z$  and time-step  $TS_y$ 
          2) Determination of the regression curve that best fits the time
              series generated in 1
          3) Storage of slope  $m_n$  inside  $m_{array}$ 
          4) Storage of variance  $\sigma_n^2$  inside  $\sigma^2_{array}$ 
        end
      end
      1) Determination of  $m_{comb}$  and  $\sigma^2_{comb}$ , accordingly to the mathematical
          formalism defined in equations 4 and 5
      2) Determination of  $CV[WS_z; TS_y]$  (equation 8)
      if  $CV[WS_z; TS_y] < CV_{best}$  then
         $WS_{best} = WS_z$ 
         $TS_{best} = TS_y$ 
         $CV_{best} = CV[WS_z; TS_y]$ 
      end
    end
  end
  end
  For the combination  $[WS_{best}; TS_{best}]$ , application of criteria  $\mathcal{C}$  (section 2.3.2) in
  order to verify if  $P_k$  is and Individual Fatigue Descriptor (IFD)
end

```
